# Supplementary material for: Delineating the role of surface grafting density of organic coatings on the colloidal stability, transport, and sorbent behavior of engineered nanoparticles
Source: Royal Society of Chemistry journal article supplement (doi:10.1039/d3en00358b), 2023-08-21
Supplement: d3en00358b1.pdf [file d3en00358b1.pdf]

1 [Supplementary material]

2 Delineating the Role of Surface Grafting Density of Organic Coatings on  
3 the Colloidal Stability, Transport, and Sorbent Behavior of Engineered  
4 Nanoparticles

5 *Junseok Lee,<sup>a</sup> Changwoo Kim,<sup>b</sup> Daniel Schmucker,<sup>c</sup> Seung Soo Steve Lee,<sup>a</sup> Shuchi Liao,<sup>d</sup>*  
6 *Natalie L. Cápiro,<sup>e</sup> Kurt D. Pennell,<sup>d</sup> and John D. Fortner<sup>\*a</sup>*

7 <sup>a</sup>Department of Chemical and Environmental Engineering, Yale University, New Haven, CT,  
8 06511 United States

9 <sup>b</sup>School of Earth Sciences and Environmental Engineering, Gwangju Institute of Science and  
10 Technology, Gwangju 61005, Republic of Korea

11 <sup>c</sup>Department of Energy, Environmental and Chemical Engineering, Washington University in St.  
12 Louis, St. Louis, MO, 63130 United States

13 <sup>d</sup>School of Engineering, Brown University, Providence, RI, 02912 United States

14 <sup>e</sup>Department of Biological and Environmental Engineering, Cornell University, Ithaca, NY, 14853  
15 USA

16

17 <sup>\*</sup>To whom correspondence should be addressed:

18 John D. Fortner: Tel: +1-314-935-9293; Email: [john.fortner@yale.edu](mailto:john.fortner@yale.edu)

## 19 **Experimental methods**

20 **Column experiments.** Column experiments were carried out in water saturated columns packed  
21 with Ottawa sand (U.S. Silica, Berkeley Springs, WV). The column system consisted of syringe  
22 pump (NE-1000, New Era Pump Systems Inc., Farmingdale, NY), fraction collector (FRAC-100,  
23 Pharmacia, Sweden), and glass column (Spectra/Chrom, TX) with dimensions of 15 cm in length  
24 and 1.5 cm in inner diameter. Prior to use, the Ottawa sand was cleaned thoroughly using 1 N of  
25 hydrochloric acid (HCl) for 24 h and subsequently rinsed several times by DI water to remove  
26 remaining HCl until achieving pH 7 and dried at 200°C. The cleaned sand was sieved for size  
27 distribution and the 30-40 mesh size fraction ( $d_{50} = 0.5075$  mm) of Ottawa sand was used in this  
28 study.

29 For column tests, 1 mM KCl solution was first introduced into the column to completely saturate  
30 the sand for 5 pore volume (PV) of column. Following saturation, nonreactive tracer tests were  
31 conducted to evaluate hydrodynamic properties of the porous media using 5 PV of 1 mM KBr  
32 solution buffered to pH 7 with 0.05 mM of  $\text{NaHCO}_3$ . Prior to NPs injection, the packed column  
33 was equilibrated and conditioned with 5 PV of 1 mM KCl solution in a background electrolyte  
34 with 0.05 mM of  $\text{NaHCO}_3$  buffer. The 5 PV of solution containing organic coated  $\text{Mn}_x\text{O}_y$  NPs  
35 ( $1 \text{ mg L}^{-1}$  as Mn concentration) with 1 mM of KCl was then introduced to the column for NPs  
36 transport experiments. The solutions were introduced into the column at 0.76 m/d of a pore-water  
37 velocity, in the range of typical values of real groundwater flow.<sup>1-3</sup> The column was rinsed with  
38 5 PV of 1 mM KCl solution without NPs (NPs-free solutions) at the same flow rate to investigate  
39 the release of attached NPs from sand. Column effluent was collected continuously using fraction  
40 collector to the tube and analyzed for the manganese concentrations in the samples using ICP-

41 OES. After each transport experiment, column were sectioned into 5 segments and retained NPs  
42 were extracted from the solid phase using 1 N of HCl solution with sonication. The concentration  
43 of NPs in each segment was measured by ICP-OES allowing for retention profiles to be described.

44

45 **Soil batch reactor experiments.** Batch reactor experiments were also conducted to evaluate the  
46 attachment of NPs to sand media for comparison with column tests. A 5 g of dried Ottawa sand  
47 was added to the 10 mL of  $Mn_xO_y$  NPs suspensions ( $1 \text{ mg L}^{-1}$  as Mn concentration), prepared in 1  
48 mM of KCl as a background electrolyte buffered to pH 7 with 0.05 mM of  $NaHCO_3$ .<sup>4</sup> The  
49 prepared suspensions were continuously mixed on a rotating rack during 48 h and then let the sand  
50 settle for 10 min. The supernatant of solution was collected and the concentration of  $Mn_xO_y$  NPs  
51 in the supernatant was measured by ICP-OES.

## 52 References

- 53 1. R. C. Heath, *Basic ground-water hydrology*, US Geological Survey, 1983.
- 54 2. G. Grisak, W. Merritt and D. Williams, A fluoride borehole dilution apparatus for  
55 groundwater velocity measurements, *Canadian Geotechnical Journal*, 1977, **14**, 554-561.
- 56 3. B. M. Patterson, M. D. Annable, E. B. Bekele and A. J. Furness, On-line groundwater  
57 velocity probe: Laboratory testing and field evaluation, *Journal of contaminant hydrology*,  
58 2010, **117**, 109-118.
- 59 4. N. Solovitch, J. Labille, J. r. m. Rose, P. Chaurand, D. Borschneck, M. R. Wiesner and J.-Y.  
60 Bottero, Concurrent aggregation and deposition of TiO<sub>2</sub> nanoparticles in a sandy porous  
61 media, *Environmental science & technology*, 2010, **44**, 4897-4902.
- 62

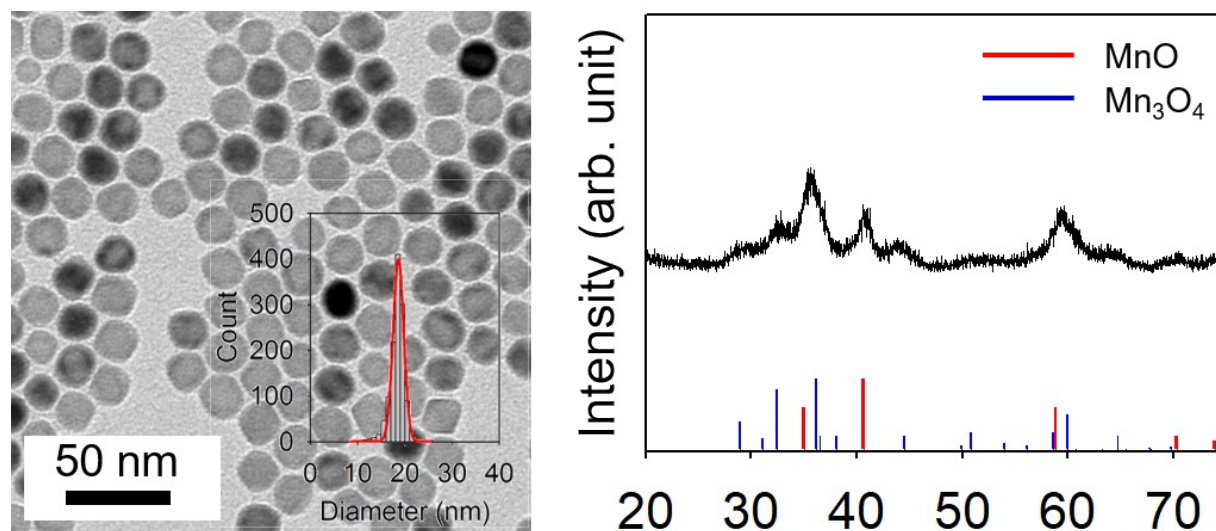

63

64 Fig. S1. Highly monodisperse manganese oxide nanoparticles ( $Mn_xO_y$  NPs) were precisely  
 65 synthesized via manganese oleate (precursor) decomposition in the presence of oleic acid at 320°C.

66 As measured by TEM, the sizes and size distributions of resulting synthesized  $Mn_xO_y$  NPs were  
 67  $18.4 \pm 1.5$  nm. XRD patterns were matched with MnO (JCPDS Card # 07-0230) and Mn<sub>3</sub>O<sub>4</sub>

68 (JCPDS Card # 24-0734); the synthesized NPs were well known as MnO core with Mn<sub>3</sub>O<sub>4</sub> shell

69 structure.

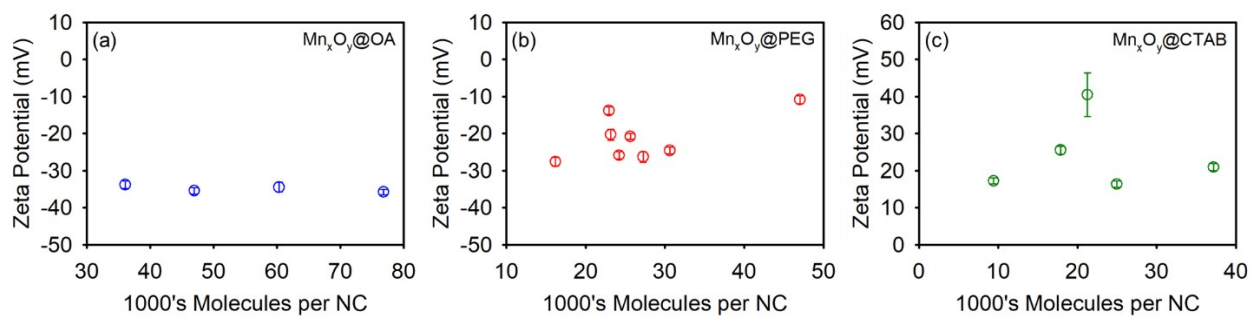

70

71 Fig S2. Zeta potential of the surface functionalized manganese oxide nanoparticles (Mn<sub>x</sub>O<sub>y</sub> NPs)  
 72 with different surface grafting densities at pH 7.0 ± 0.2; (a)Mn<sub>x</sub>O<sub>y</sub>@OA, (b)Mn<sub>x</sub>O<sub>y</sub>@PEG, and  
 73 (c)Mn<sub>x</sub>O<sub>y</sub>@CTAB.

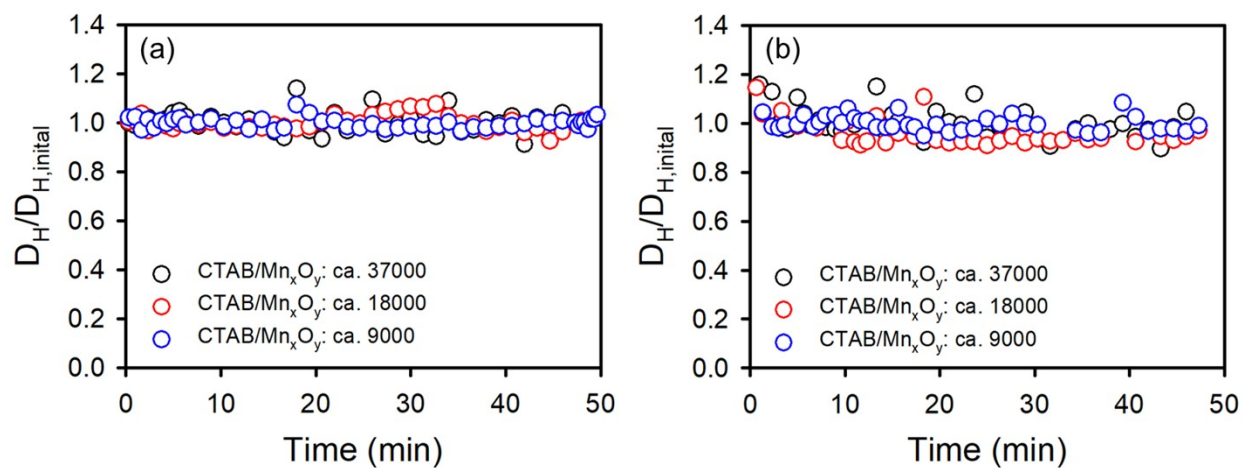

74

75 Fig. S3. Aggregation profile of  $Mn_xO_y@CTAB$  NPs with various surface grafting densities.

76 Aggregation experiments were performed in the presence of (a) 2000 mM of NaCl and (b) 1000

77 mM of  $CaCl_2$  concentrations at pH  $7.0 \pm 0.2$ .

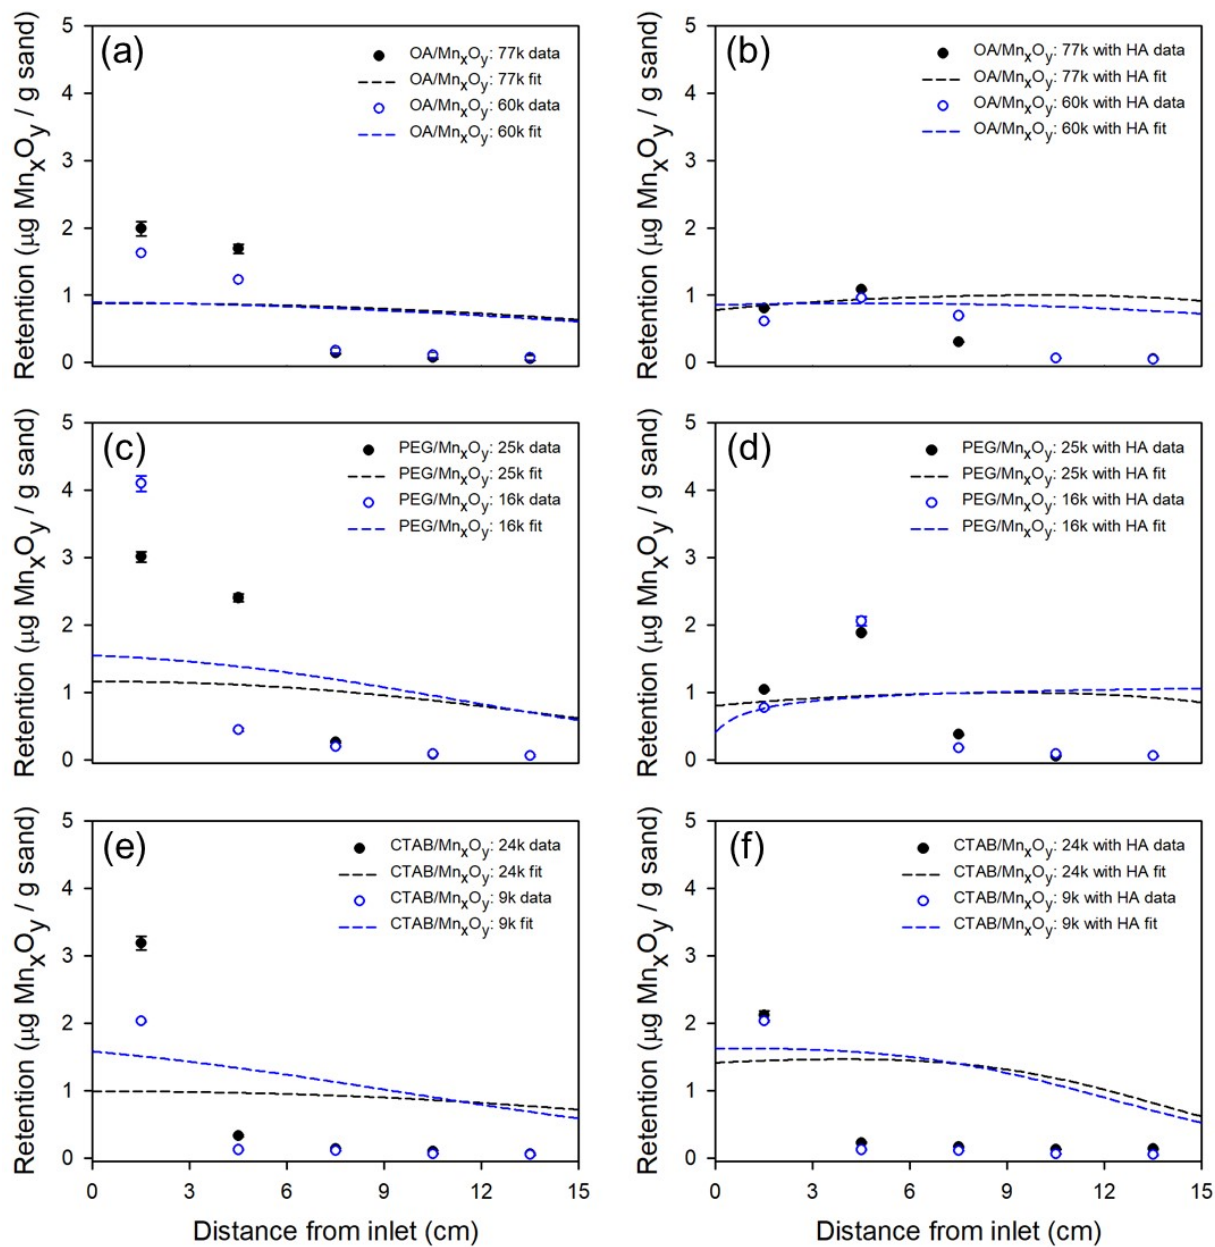

78

79 Fig. S4. Experimental and fitted retention profiles of  $Mn_xO_y$  NPs with different grafting densities  
 80 in water saturated column packed with 30-40 mesh Ottawa sand in the absence and presence of  
 81 HA; (a-b)  $Mn_xO_y@OA$ , (c-d)  $Mn_xO_y@PEG$ , and (e-f)  $Mn_xO_y@CTAB$ . All column experiments  
 82 were performed at 0.76 m/d of a pore-water velocity and  $\text{pH } 7.0 \pm 0.2$ .



83 Table S1. Relative concentration ( $C/C_0$ ) obtained by batch reactor experiments with respect to  
84 the surface grafting density of organic coatings. All experiments were conducted at  $\text{pH } 7.0 \pm 0.2$ .

| Surface Stabilizer | Grafting density | Relative Concentration<br>( $C/C_0$ ) |
|--------------------|------------------|---------------------------------------|
| OA                 | 77000            | $0.761 \pm 0.01$                      |
|                    | 60000            | $0.624 \pm 0.01$                      |
| PEG                | 25000            | $0.567 \pm 0.01$                      |
|                    | 16000            | $0.517 \pm 0.01$                      |
| CTAB               | 24000            | $1.088 \pm 0.01$                      |
|                    | 9000             | $0.851 \pm 0.01$                      |

85

86 Table S2. Fitted parameters obtained from NP BTC data using MFT model.

| Column identifier                               | $k_{att}$ (h <sup>-1</sup> ) | $k_{det}$ (h <sup>-1</sup> ) | $S_{max}$ (μg/g sand) |
|-------------------------------------------------|------------------------------|------------------------------|-----------------------|
| OA/Mn <sub>x</sub> O <sub>y</sub> :77k          | 1.386 ± 0.23                 | 0.016 ± 0.01                 | 1.495 ± 0.26          |
| OA/Mn <sub>x</sub> O <sub>y</sub> :60k          | 1.200 ± 0.12                 | 0.015 ± 0.01                 | 1.556 ± 0.32          |
| OA/Mn <sub>x</sub> O <sub>y</sub> :77k with HA  | 3.068 ± 0.85                 | 0.027 ± 0.01                 | 1.500 ± 0.16          |
| OA/Mn <sub>x</sub> O <sub>y</sub> :60k with HA  | 1.545 ± 0.31                 | 0.019 ± 0.01                 | 1.494 ± 0.24          |
| PEG/Mn <sub>x</sub> O <sub>y</sub> :25k         | 1.795 ± 0.29                 | 0.016 ± 0.01                 | 1.970 ± 0.44          |
| PEG/Mn <sub>x</sub> O <sub>y</sub> :16k         | 1.820 ± 0.25                 | 0.012 ± 0.00                 | 2.488 ± 0.59          |
| PEG/Mn <sub>x</sub> O <sub>y</sub> :25k with HA | 3.361 ± 1.00                 | 0.024 ± 0.01                 | 1.455 ± 0.18          |
| PEG/Mn <sub>x</sub> O <sub>y</sub> :16k with HA | 30.125 ± 21.49               | 0.050 ± 0.02                 | 1.230 ± 0.03          |
| CTAB/Mn <sub>x</sub> O <sub>y</sub> :24k        | 1.452 ± 0.22                 | 0.011 ± 0.01                 | 1.410 ± 0.16          |
| CTAB/Mn <sub>x</sub> O <sub>y</sub> :9k         | 1.426 ± 0.14                 | 0.007 ± 0.00                 | 2.425 ± 0.46          |
| CTAB/Mn <sub>x</sub> O <sub>y</sub> :24kwith HA | 3.317 ± 0.85                 | 0.014 ± 0.01                 | 2.005 ± 0.39          |
| CTAB/Mn <sub>x</sub> O <sub>y</sub> :9k with HA | 2.841 ± 0.55                 | 0.010 ± 0.00                 | 2.160 ± 0.41          |

87 Values after '±' indicates 95% confidence limits of fitted parameters.
